# Supplementary material for: Downregulation of the Netrin-1 Receptor UNC5b Underlies Increased Placental Angiogenesis in Human Gestational Diabetes Mellitus
Source: MDPI journal article supplement (doi:10.3390/ijms20061408), 2019-03-20
Supplement: s1 [file s1]

## SUPPLEMENTARY FIGURE LEGENDS

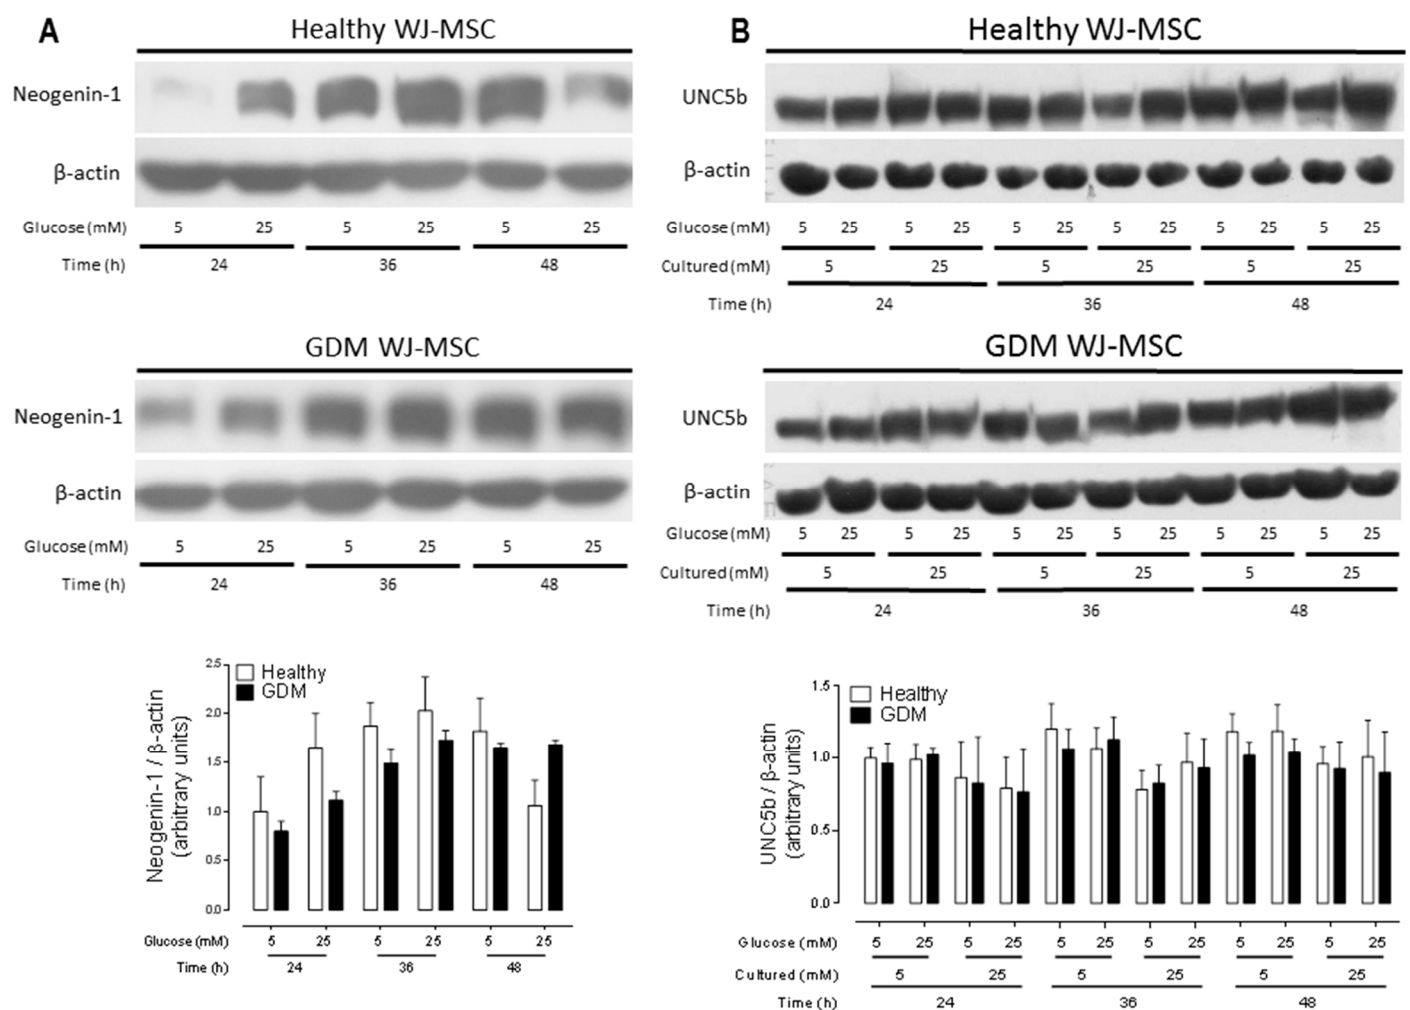

**Figure S1. Protein levels of classical Netrin-1 receptors in normal and GDM WJ-MSC.** *A.* Whole cell lysate was evaluated by Western blot for Neogenin-1 in WJ-MSC from normal and GDM cultures.  $\beta$ -actin was used as internal loading control. Exposure to different D-glucose concentration 5 - 25 mM for 24 - 48 hours. Data correspond to the mean  $\pm$  S.E.M. (normal n=5, GDM n=3). *B.* Western blot for UNC5b in normal and GDM WJ-MSC.  $\beta$ -actin was used as internal loading control. Each quantified result corresponds to the mean  $\pm$  S.E.M. (normal n=3, GDM n=6).

**Table 2.** Comparison of angiogenesis between healthy and GDM HUVEC.

| Healthy vs. GDM | DMEM | EGM  | CM 5 mM | CM 25 mM | CM 5 mM +2F5 | CM 25 mM +2F5 |
|-----------------|------|------|---------|----------|--------------|---------------|
| DMEM            | *    | n.s. | n.s.    | n.s.     | *            | *             |
| EGM             | *    | n.s. | n.s.    | n.s.     | *            | *             |
| CM 5 mM         | *    | n.s. | *       | *        | *            | *             |
| CM 25 mM        | *    | n.s. | *       | *        | *            | *             |
| CM 5 mM + 2F5   | *    | n.s. | n.s.    | n.s.     | *            | *             |
| CM 25 mM + 2F5  | *    | n.s. | n.s.    | n.s.     | *            | *             |

**Figure S2. Statistical analysis of different experimental conditions, comparing angiogenesis among healthy and GDM HUVEC.** Left column correspond to normal HUVEC (N) and upper row correspond to GDM HUVEC. Data correspond to the mean  $\pm$  S.E.M. (CM WJ-MSC and HUVEC, n=3). \* $p < 0.05$  Normal vs. GDM, n.s. not significant.

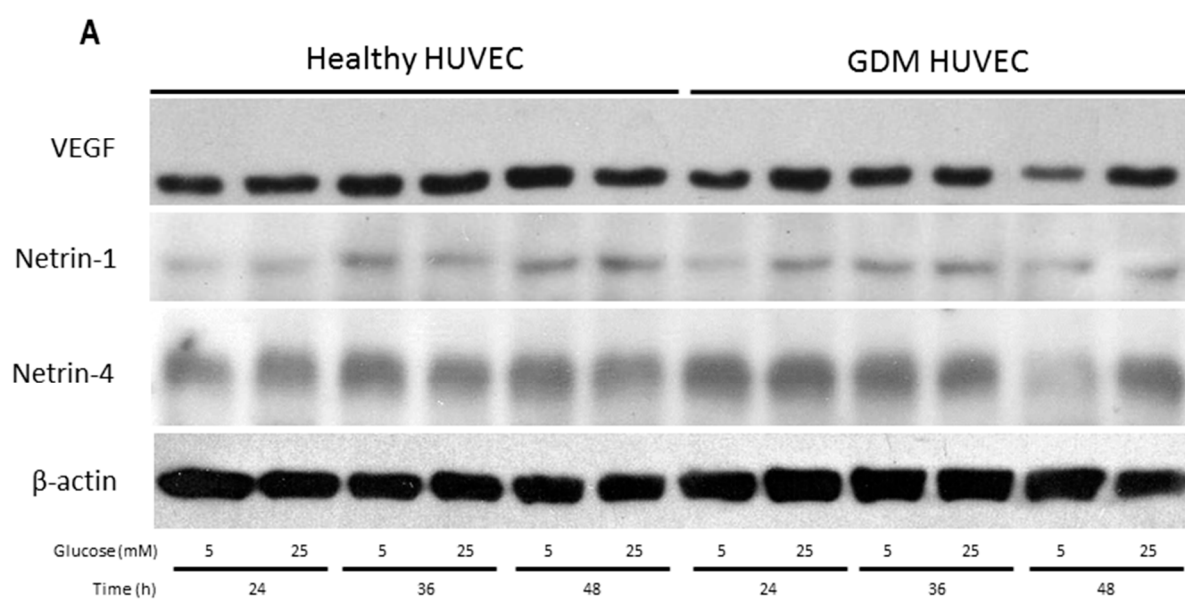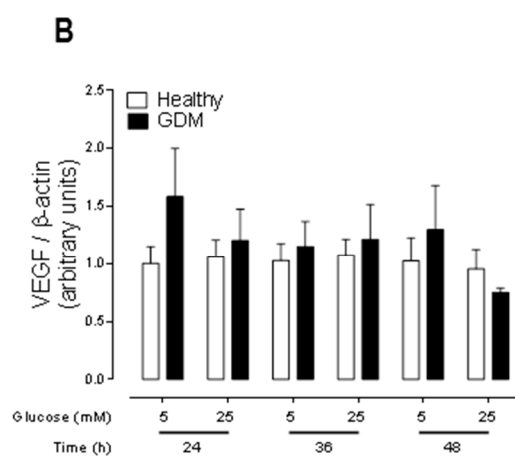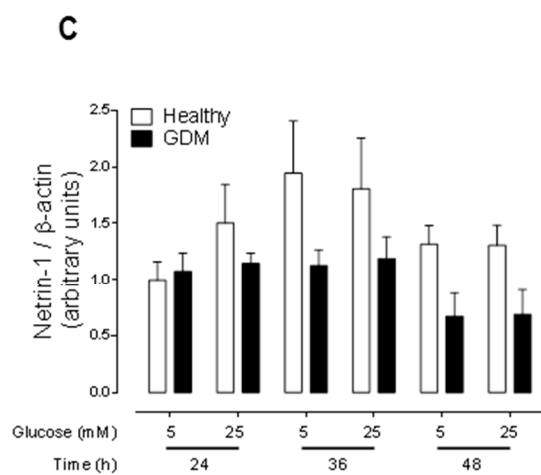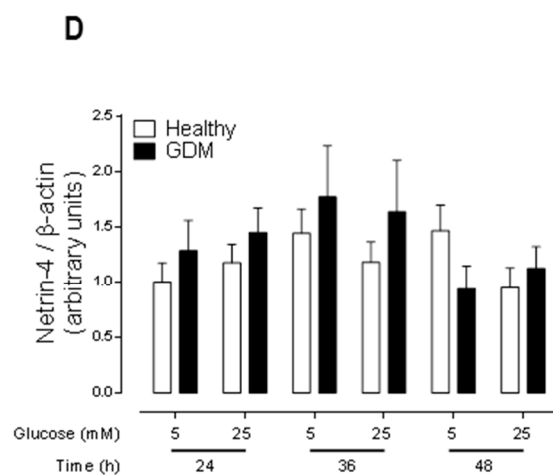

**Figure S3. Protein expression levels of canonical and non-canonical ligands in normal and GDM HUVEC.** *A.* Whole cell lysate was evaluated by Western blot for VEGF, Netrin-1, Netrin-4 in HUVEC from normal and GDM cultures.  $\beta$ -actin was used as internal loading control. Exposure to different D-glucose concentration 5 - 25 mM for 24 - 48 hours. Data correspond to the mean  $\pm$  S.E.M. (normal n=7, GDM n=3). *B.* Graph show quantified results for VEGF. *C.* Netrin-1 and *D.* Netrin-4.

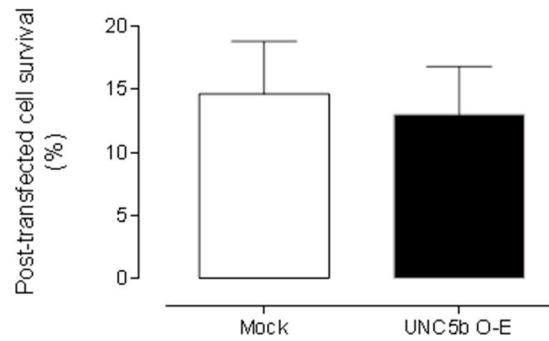

**Figure S4. Cell survival after cell transfection.** Healthy HUVEC was transfected with Mock over-expressing or UNC5b O-E construct (1 $\mu$ g/well) in primary cell medium 20% FBS, and cultured for 48 hours in normal HUVEC.
